# Supplementary material
Source: publisher site journal article supplement (https://www.dovepress.com/article/269971)
Supplement: Supplementary file 1 [file get_supplementary_file.php]

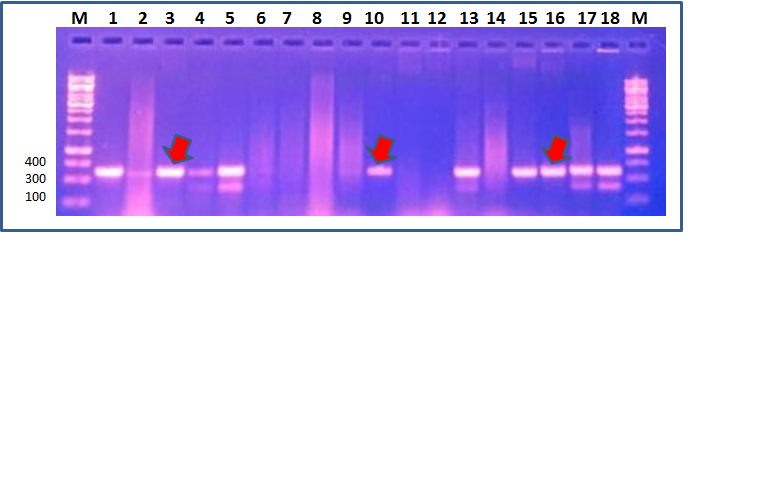


**Fig. 1S.** Agarose gel electrophoresis of multiplex-PCR amplification of *bla*KPC /*bla*NDM genes insome XDR Gram negative isolates**,** lane M, a gene Ruler 100 bp ladder; lane 1, a positive control; lanes 2,3,4,5,10,13,15,16,17,18, are positive for *bla*KPC results with an expected size of 332 bp; lanes, 6,7,8,9,11,12 were negative. All isolate were negative for *bla*NDM. Arrows indicated positive bands.


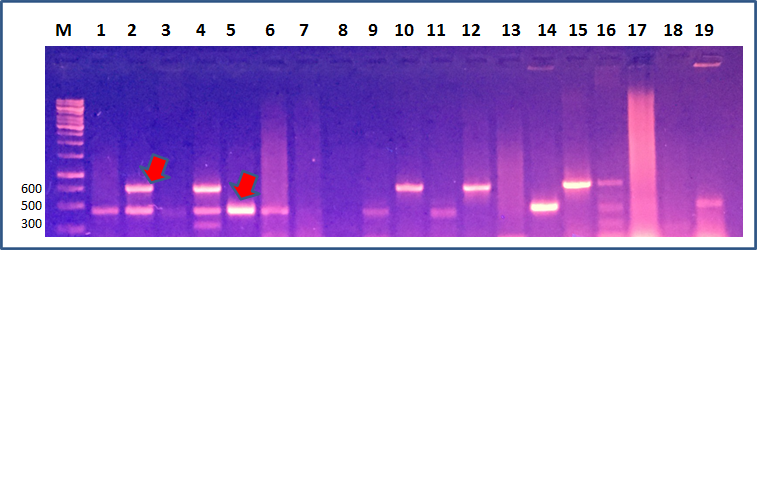


**Fig. 2S.** Agarose gel electrophoresis of multiplex-PCR amplification of *bla*oxa-48 /*bla*VIM genes insome XDR Gram negative isolates**,** lane M, a gene Ruler 100 bp ladder; lanes 1, 2, 3, 4, 5, 6, 9, 11, 14, 16, 19, are positive for *bla*KPC results with an expected size of 332 bp; lanes; 2, 4, 10, 12, 15, 16 were are positive for *bla*WIM results with an expected size of 748 bp. Arrow indicated positive bands of both genes.
